1 **Structural basis for the inhibition of COVID-19 virus main protease**  
2 **by carmofur, an antineoplastic drug**

3

4 **Author**

5 Zhenming Jin<sup>1,2\*</sup>, Yao Zhao<sup>1\*</sup>, Yuan Sun<sup>3\*</sup>, Bing Zhang<sup>1</sup>, Haofeng Wang<sup>1,4</sup>, Yan Wu<sup>3</sup>,  
6 Yan Zhu<sup>1</sup>, Chen Zhu<sup>1</sup>, Tianyu Hu<sup>1</sup>, Xiaoyu Du<sup>1,2</sup>, Yinkai Duan<sup>1</sup>, Jing Yu<sup>1</sup>, Xiaobao  
7 Yang<sup>1</sup>, Xiuna Yang<sup>1</sup>, Xiang Liu<sup>5</sup>, Luke W. Guddat<sup>6</sup>, Gengfu Xiao<sup>3</sup>, Leike Zhang<sup>3†</sup>,  
8 Haitao Yang<sup>1†</sup> & Zihe Rao<sup>1,2,5</sup>

9

10 <sup>1</sup>Shanghai Institute for Advanced Immunochemical Studies and School of Life Science  
11 and Technology, ShanghaiTech University, Shanghai, China.

12 <sup>2</sup>Laboratory of Structural Biology, School of Life Sciences and School of Medicine,  
13 Tsinghua University, Beijing, China.

14 <sup>3</sup>State Key Laboratory of Virology, Wuhan Institute of Virology, Center for Biosafety  
15 Mega-Science, Chinese Academy of Sciences, Wuhan, China.

16 <sup>4</sup>School of Life Sciences, Tianjin University, Tianjin, China

17 <sup>5</sup>State Key Laboratory of Medicinal Chemical Biology, Frontiers Science Center for  
18 Cell Response, College of Life Sciences, College of Pharmacy, Nankai University,  
19 Tianjin, China.

20 <sup>6</sup>School of Chemistry and Molecular Biosciences, the University of Queensland,  
21 Brisbane, Australia.

22 \*These authors contributed equally: Zhenming Jin, Yao Zhao and Yuan Sun.

23 †e-mail: [zhangleike@wh.iov.cn](mailto:zhangleike@wh.iov.cn); [yanght@shanghaitech.edu.cn](mailto:yanght@shanghaitech.edu.cn)

24

25 **Abstract**

26 COVID-19 virus is the cause of a debilitating and life-threatening infectious  
27 pulmonary disease that is now responsible for a global pandemic. Currently, there are  
28 no specific drugs or vaccines to contain this virus. The main protease ( $M^{pro}$ ) of COVID-  
29 19 virus is a key enzyme, which plays an essential role in viral replication and  
30 transcription, making it an ideal drug target. An FDA-approved antineoplastic drug,  
31 carmofur, has been identified as an inhibitor that targets COVID-19 virus  $M^{pro}$ .  
32 However, its inhibitory mechanism is unknown. Here, we report the 1.6-Å crystal  
33 structure of COVID-19 virus  $M^{pro}$  in complex with carmofur. The crystal structure  
34 shows that carmofur contains an electrophilic carbonyl reactive group, which  
35 covalently binds to C145, a member of the catalytic dyad. As a result, its fatty acid tail  
36 occupies the hydrophobic S2 subsite of  $M^{pro}$  whilst its 5-fluorouracil head is cleaved as  
37 product of the new covalent bond that has formed. Carmofur is active in a cell based  
38 antiviral assay with an  $EC_{50}$  of 24.87  $\mu$ M. It is therefore a promising lead compound  
39 for the development of new antivirals to target COVID-19.

40

## 41 **Introduction**

42 Starting in December 2019, a highly infectious viral disease has now spread and  
43 reached over 200 countries leading to a global public health emergency and pandemic.  
44 The etiological agent of the disease is a coronavirus (identified as COVID-19).  
45 According to the WHO COVID-2019 Situation Report-77, there were 1,210,956  
46 confirmed cases and 67,594 deaths, with a mortality rate at 5.58%. The number of  
47 confirmed cases worldwide continues to grow at a rapid rate and is far from peaking.  
48 However, there are no specific drugs or vaccines available to control symptoms or the  
49 spread of this disease.

50 The COVID-19 virus has a ~30,000 nt RNA genome encoded with two translation  
51 products, polyproteins 1a and 1ab (pp1a and pp1ab) which are crucial for replication  
52 and transcription<sup>1,2</sup>. These polyproteins become matured non-structural and structural  
53 proteins through auto-cleavage by the main protease (M<sup>pro</sup>) and by a papain-like  
54 protease<sup>3</sup>. Because of this, M<sup>pro</sup> is an excellent target for anti-coronavirus (CoV) drug  
55 development<sup>4-6</sup>. In order to rapidly discover new drug leads that target COVID-19 virus  
56 M<sup>pro</sup>, our group screened over 10,000 compounds from a library that consisted of  
57 approved drugs, drug candidates in clinical trials, and other pharmacologically active  
58 compounds. Amongst these we identified carmofur as compound that can inhibit M<sup>pro</sup>  
59 with an IC<sub>50</sub> of 1.82  $\mu$ M<sup>7</sup>.

60 Carmofur is an FDA-approved antineoplastic drug, and a derivative of 5-  
61 fluorouracil (5-FU) a widely drug used against solid cancers. 5-FU is especially  
62 efficient for controlling head, neck, and gastrointestinal tumors<sup>8</sup>. Carmofur (Figure 1A)  
63 is a derivative of this compound and has been used in colon cancer therapy since 1981<sup>9</sup>.  
64 Clinical research has also shown that carmofur has a curative effect on breast, gastric,  
65 bladder, and colorectal cancers<sup>10-12</sup>. The target for carmofur is believed to be  
66 thymidylate synthase an enzyme that converts deoxy uridine monophosphate (dUMP)  
67 to deoxythymidine monophosphate<sup>13,14</sup>. Carmofur has also been shown to target human  
68 acid ceramidase (AC)<sup>15</sup>, a potential drug target for the treatment of melanoma and  
69 glioblastoma tumors<sup>16,17</sup>. Carmofur inhibits human AC through the covalent  
70 modification of its catalytic cysteine<sup>18</sup>. Our previous data shows that carmofur inhibits  
71 M<sup>pro</sup> activity<sup>7</sup>, but the molecular details as to how it inhibits this target are unresolved.  
72 Here, we have determined the 1.6-Å crystal structure of COVID-19 virus M<sup>pro</sup> in  
73 complex with this compound. The structure shows that the fatty acid tail from carmofur

74 covalently binds to C145 at the catalytic center of the viral protease (Figure 1B).  
75 Furthermore, cell-based assays show that carmofur has an EC<sub>50</sub> value of ~25 μM for  
76 the COVID-19 virus. This high-resolution crystal structure thus provides the structural  
77 basis for the design of new carmofur analogs with clinical potential to treat COVID-  
78 2019.

## 79 **Results**

### 80 **Overall structure of M<sup>pro</sup>-carmofur complex**

81 The structure of COVID-19 virus M<sup>pro</sup> in complex with the fatty acid tail of  
82 carmofur has been solved at a resolution of 1.6 Å (Extended Data Table 1). In accord  
83 with our previous studies<sup>4,5,19-21</sup>, this M<sup>pro</sup> complex also forms a homodimer. In the  
84 crystal structure, this is formed by two polypeptides (protomer A and B) related by  
85 crystallographic symmetry (Figure 1C). All of the residues, 1–306, in the polypeptide  
86 could be traced in the electron density map. Each protomer is composed of three  
87 domains, similar to those found in other M<sup>pro</sup> structures (Figure 1A). Domain I (residues  
88 10–99) and domain II (residues 100–184) are two β-sheet rich domains. Domain III  
89 (residues 201–303) is linked to domain II by a long loop region (residues 185–200).  
90 The buried surface area at the dimer interface is ~1409 Å<sup>2</sup>. This is mainly due to  
91 interactions by domain II, domain III and the N-termini of each polypeptide.

92 There are twelve cysteine residues across the protein with six buried in the core  
93 (Figure S3). The other six cysteines are exposed to the surface, with one of these (C145)  
94 located in the catalytic center, which lies in a cleft between domain I and domain II.  
95 The long loop connecting domain II and domain III also participates in the formation  
96 of the substrate binding pocket. S1 of one protomer interacts with E166 of the neighbor  
97 protomer to stabilize the S1 subsite of the substrate-binding pocket. This structural  
98 feature is essential for catalysis.

99

### 100 **Carmofur is covalently linked to the catalytic cysteine**

101 The substrate-binding pocket lies in the cleft between domain I and domain II and  
102 is characterized by the presence of the catalytic dyad residues, C145 and H41 (Figure  
103 2A, 2B). The electron density map unambiguously shows that the fatty acid moiety  
104 (C<sub>7</sub>H<sub>14</sub>NO) of carmofur is linked to the S<sub>γ</sub> atom of C145 through a 1.8-Å covalent bond,  
105 and that the fatty acid tail is inserted into the S2 subsite (Figure 2B, 2C). It suggests

106 that the sulfhydryl group of catalytic C145 attacks the electrophilic carbonyl group of  
107 carmofur, resulting in the covalent modification of the cysteine residue by the fatty acid  
108 moiety (C<sub>7</sub>H<sub>14</sub>NO) and the release of the 5-fluorouracil head (Figure S1A). This result  
109 is also consistent with our previous tandem MS/MS studies<sup>7</sup>.

110 In addition to the C-S covalent bond, the inhibitor is stabilized by numerous  
111 hydrogen bonds and hydrophobic interactions (Figure 2C, S1B). The carbonyl oxygen  
112 of the inhibitor occupies the oxyanion hole and forms hydrogen bonds (3.0-Å) with the  
113 backbone amides of C143 and C145, mimicking the tetrahedral oxyanion intermediate  
114 formed during protease cleavage (Figure 2C). The fatty acid tail, which presents in an  
115 extended conformation, inserts into the bulky hydrophobic S2 subsite (composed of the  
116 side chains of H41, M49, Y54, M165, and the alkyl portion of the side chain of D187)  
117 (Figure 2B, 2C). The hydrophobic interactions are mainly contributed by the side chains  
118 of H41, M49 and M165, all of which run parallel with the alkyl part of the fatty acid  
119 tail of the inhibitor (Figure 2C, S1B).

120 Compared with that for the Michael acceptor, inhibitor N3<sup>7,22</sup>, the covalent  
121 modification mechanism for carmofur is different. In this case, the catalytic C145  
122 attacks the electrophilic carbonyl group of carmofur and results in the covalent  
123 modification of the cysteine residue while in the case of N3, covalent modification  
124 occurred through Michael addition of the vinyl group.

125 The overall structures of the M<sup>pro</sup>-carmofur complex and the M<sup>pro</sup>N3 complex are  
126 similar with an RMSD of 0.286 Å for all C $\alpha$  atoms. Though slight, the largest  
127 conformational differences occur in the substrate binding pocket (Figure S2A).  
128 Compared with the M<sup>pro</sup>-N3 complex structure, the backbone surrounding the inhibitor  
129 binding site of carmofur complex structure moves in a slightly outward direction  
130 (Figure S2A). A major difference between N3 and carmofur binding is that N3 occupies  
131 four subsites (S1, S2, S4 and S1'), (Figure S2B) whereas carmofur only occupies the  
132 S2 subsite. Thus, there is good scope for structural elaboration of this lead. Interestingly,  
133 a molecule of DMSO fills the S1 subsite, a region corresponding to the location where  
134 the lactam ring in the N3 bound complex is located (Figure S2B). This observation  
135 should also assist in the design of more potent carmofur analogs as inhibitors of  
136 COVID-19 M<sup>pro</sup>.

137

138 **Antiviral activity assay**

139 In our preliminary antiviral studies reported recently<sup>7</sup>, at a concentration of 10  $\mu\text{M}$   
140 treatment in COVID-19 virus infected Vero cells, ebselen showed potent antiviral effect  
141 while carmofur did not demonstrate strong antiviral activity at this concentration. It  
142 indicates that carmofur have a larger  $\text{EC}_{50}$  value than that for Ebselen ( $\text{EC}_{50}=4.67 \mu\text{M}$ ).  
143 We then set out to determine the accurate  $\text{EC}_{50}$  value for carmofur. As described in our  
144 previous study<sup>23</sup>, Vero E6 cells were treated with a series of concentrations of carmofur,  
145 and were then were infected with COVID-19 virus. As a result, the  $\text{EC}_{50}$  for carmofur  
146 was determined to be 24.87  $\mu\text{M}$  (Figure 3B). To verify this result, infected cells were  
147 fixed and subjected to immunofluorescence assay (IFA) using anti-sera against viral  
148 nucleocapsid protein (NP). Figure 3A shows NP expression levels decreased after the  
149 treatment of carmofur, in accordance with the quantitative RT-PCR study. A  
150 cytotoxicity assay was also performed in Vero E6 cells with a  $\text{CC}_{50}$  value of 132.7  $\mu\text{M}$   
151 (Figure 3C). Thus, the compound has a favorable selectivity index (SI) of 5.34, but  
152 optimization is needed to make it an effective drug.

## 153 Discussion

154 In conclusion, we have solved the 1.6-Å crystal structure of  $\text{M}^{\text{pro}}$  in complex with  
155 an FDA approved antineoplastic, carmofur. This study shows that carmofur directly  
156 modifies the catalytic cysteine of COVID-19 virus  $\text{M}^{\text{pro}}$  leading to its inhibition. The  
157 study also provides a basis for rational design of carmofur analogs to treat COVID-19  
158 infections. Since  $\text{M}^{\text{pro}}$  is highly conserved among all CoV  $\text{M}^{\text{pro}}$ s, carmofur and carmofur  
159 analogs could also be effective against other CoV  $\text{M}^{\text{pro}}$ s.

160 We also showed that carmofur can inhibitor COVID-19 virus at a lower  
161 concentration than its cellular cytotoxicity ( $\text{SI} > 5$ ), further suggesting that carmofur is  
162 a good starting point to develop inhibitors with clinical potential to treat COVID-19. In  
163 addition, it has been reported that carmofur might be a novel therapeutic agent for acute  
164 lung injury (ALI)<sup>24</sup> which can also benefit COVID-19 patients since lung injury is an  
165 outcome that can occur as the result of this infection.

166

## 167 References

- 168 1. Wu, F. et al. A new coronavirus associated with human respiratory disease in China. *Nature* **579**,  
169 265-269 (2020).
- 170 2. Zhou, P. et al. A pneumonia outbreak associated with a new coronavirus of probable bat origin.  
171 *Nature* **579**, 270-273 (2020).
- 172 3. Hegyi, A. & Ziebuhr, J. Conservation of substrate specificities among coronavirus main  
173 proteases. *J Gen Virol* **83**, 595-599 (2002).
- 174 4. Anand, K. et al. Structure of coronavirus main proteinase reveals combination of a  
175 chymotrypsin fold with an extra alpha-helical domain. *Embo j* **21**, 3213-24 (2002).
- 176 5. Yang, H. et al. The crystal structures of severe acute respiratory syndrome virus main protease  
177 and its complex with an inhibitor. *Proc Natl Acad Sci U S A* **100**, 13190-5 (2003).
- 178 6. Pillaiyar, T., Manickam, M., Namasivayam, V., Hayashi, Y. & Jung, S.H. An Overview of Severe  
179 Acute Respiratory Syndrome-Coronavirus (SARS-CoV) 3CL Protease Inhibitors:  
180 Peptidomimetics and Small Molecule Chemotherapy. *J Med Chem* **59**, 6595-628 (2016).
- 181 7. Jin, Z. et al. Structure of Mpro from COVID-19 virus and discovery of its inhibitors. *bioRxiv*,  
182 2020.02.26.964882 (2020).
- 183 8. Sara, J.D. et al. 5-fluorouracil and cardiotoxicity: a review. *Ther Adv Med Oncol* **10**,  
184 1758835918780140 (2018).
- 185 9. Sakamoto, J. et al. An individual patient data meta-analysis of adjuvant therapy with capecitabine  
186 in patients with curatively resected colon cancer. *Jpn J Clin Oncol* **35**, 536-44 (2005).
- 187 10. Liu, P., Ma, S., Liu, H., Han, H. & Wang, S. HCFU inhibits cervical cancer cells growth and  
188 metastasis by inactivating Wnt/ $\beta$ -catenin pathway. *J Cell Biochem* (2017).
- 189 11. Gröhn, P. et al. Oral capecitabine in advanced gastrointestinal cancer. *Am J Clin Oncol* **13**, 477-9  
190 (1990).
- 191 12. Maehara, Y., Anai, H., Kusumoto, H., Kusumoto, T. & Sugimachi, K. Colorectal carcinoma in  
192 vitro is more sensitive to 1-hexylcarbonyl-5-fluorouracil compared with six other antitumor  
193 drugs: carboquone, Adriamycin, mitomycin C, aclacinomycin A, cisplatin, 5-fluorouracil. *Dis*  
194 *Colon Rectum* **31**, 62-7 (1988).
- 195 13. Ooi, A. et al. Plasma, intestine and tumor levels of 5-fluorouracil in mice bearing L1210 ascites  
196 tumor following oral administration of 5-fluorouracil, UFT (mixed compound of tegafur and  
197 uracil), capecitabine and 5'-deoxy-5-fluorouridine. *Biol Pharm Bull* **24**, 1329-31 (2001).
- 198 14. Sato, S., Ueyama, T., Fukui, H., Miyazaki, K. & Kuwano, M. [Anti-tumor effects of capecitabine  
199 on human 5-FU resistant cells]. *Gan To Kagaku Ryoho* **26**, 1613-6 (1999).
- 200 15. Nguyen, H.S., Awad, A.J., Shabani, S. & Doan, N. Molecular Targeting of Acid Ceramidase in  
201 Glioblastoma: A Review of Its Role, Potential Treatment, and Challenges. *Pharmaceutics*  
202 **10**(2018).
- 203 16. Lai, M. et al. Complete Acid Ceramidase ablation prevents cancer-initiating cell formation in  
204 melanoma cells. *Sci Rep* **7**, 7411 (2017).
- 205 17. Doan, N.B. et al. Acid ceramidase and its inhibitors: a de novo drug target and a new class of  
206 drugs for killing glioblastoma cancer stem cells with high efficiency. *Oncotarget* **8**, 112662-  
207 112674 (2017).
- 208 18. Dementiev, A. et al. Molecular Mechanism of Inhibition of Acid Ceramidase by Capecitabine. *J*  
209 *Med Chem* **62**, 987-992 (2019).
- 210 19. Xue, X. et al. Structures of two coronavirus main proteases: implications for substrate binding  
211 and antiviral drug design. *J Virol* **82**, 2515-27 (2008).
- 212 20. Ren, Z. et al. The newly emerged SARS-like coronavirus HCoV-EMC also has an "Achilles'  
213 heel": current effective inhibitor targeting a 3C-like protease. *Protein Cell* **4**, 248-50 (2013).
- 214 21. Wang, F., Chen, C., Tan, W., Yang, K. & Yang, H. Structure of Main Protease from Human  
215 Coronavirus NL63: Insights for Wide Spectrum Anti-Coronavirus Drug Design. *Sci Rep* **6**,  
216 22677 (2016).
- 217 22. Yang, H. et al. Design of wide-spectrum inhibitors targeting coronavirus main proteases. *PLoS*  
218 *Biol* **3**, e324 (2005).
- 219 23. Wang, M. et al. Remdesivir and chloroquine effectively inhibit the recently emerged novel  
220 coronavirus (2019-nCoV) in vitro. *Cell Res* **30**, 269-271 (2020).
- 221 24. Wu, K., Xiu, Y., Zhou, P., Qiu, Y. & Li, Y. A New Use for an Old Drug: Capecitabine Attenuates  
222 Lipopolysaccharide (LPS)-Induced Acute Lung Injury via Inhibition of FAAH and NAAA  
223 Activities. *Front Pharmacol* **10**, 818 (2019).
- 224 25. Kabsch, W. *XDS. Acta Crystallogr D Biol Crystallogr* **66**, 125-132 (2010).

- 225 26. McCoy, A.J. et al. Phaser crystallographic software. *J Appl Crystallogr* **40**, 658-674 (2007).  
226 27. Liebschner, D. et al. Macromolecular structure determination using X-rays, neutrons and  
227 electrons: recent developments in Phenix. *Acta Crystallogr D Struct Biol* **75**, 861-877 (2019).  
228 28. Emsley, P., Lohkamp, B., Scott, W.G. & Cowtan, K. Features and development of Coot. *Acta*  
229 *Crystallogr D Biol Crystallogr* **66**, 486-501 (2010).  
230 29. Afonine, P.V. et al. Towards automated crystallographic structure refinement with phenix.refine.  
231 *Acta Crystallogr D Biol Crystallogr* **68**, 352-67 (2012).  
232



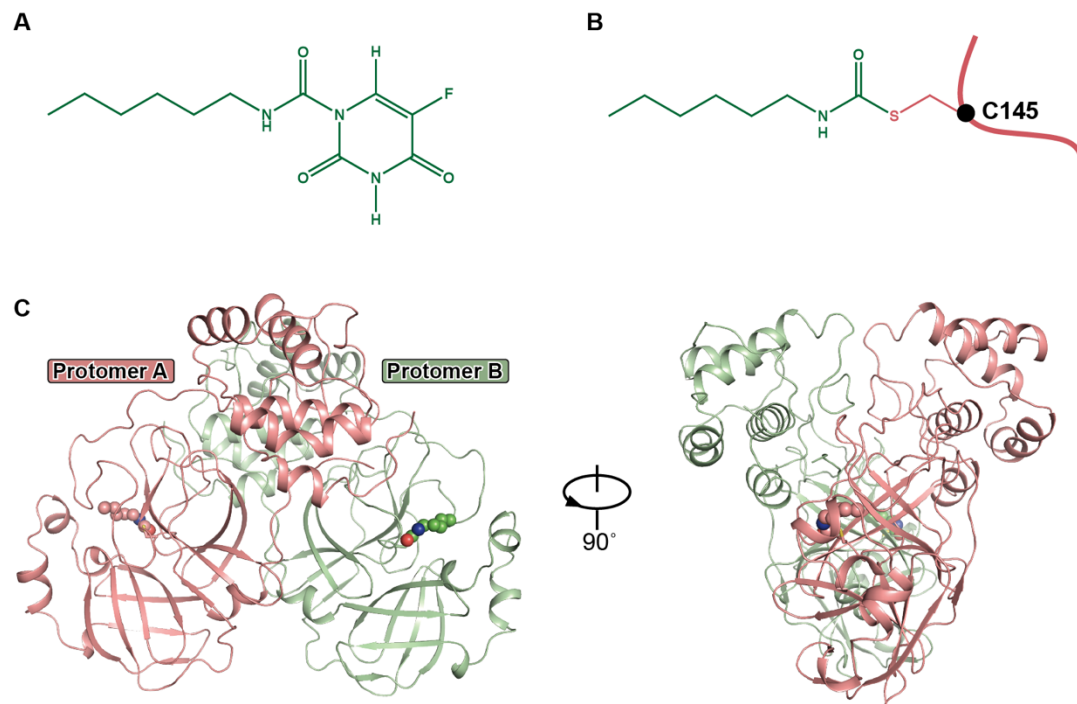

233

234 **Figure 1. Overall structure of COVID-19 virus M<sup>pro</sup> in complex with carmofur**

235 A. The chemical structure of carmofur.

236 B. The binding mode of carmofur to COVID-19 virus M<sup>pro</sup>. The red curve represents  
237 COVID-19 virus M<sup>pro</sup> polypeptide with the sidechain of Cys145 protruding.

238 C. The overall structure of COVID-19 virus M<sup>pro</sup> in complex with carmofur. The  
239 salmon and green represent the different protomers. The carmofur atoms  
240 are shown as solid spheres.

241

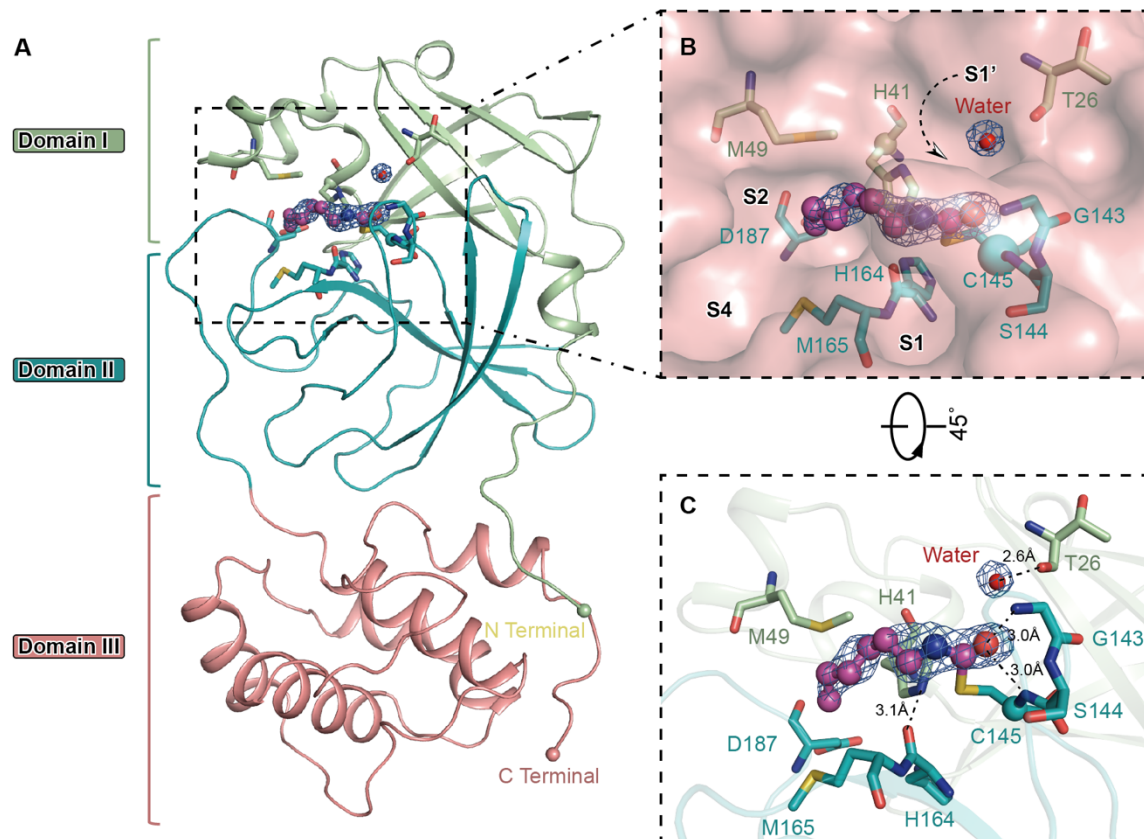

242

243

**Figure 2. Catalytic center of the COVID-19 virus M<sup>pro</sup>-carmofur complex**

244 A. The structure of a single protomer. The three domains are shown in three different  
245 colors. The catalytic center is located within the dashed square.

246 B. Zoom in of the catalytic center. The residues that participate in carmofur binding  
247 are shown as stick models. Carmofur is shown as a ball and stick model with the  
248 carbons in magenta. Water is presented as a red sphere.

249 C. A rotated view of the binding site, but with the surface removed.

250

251

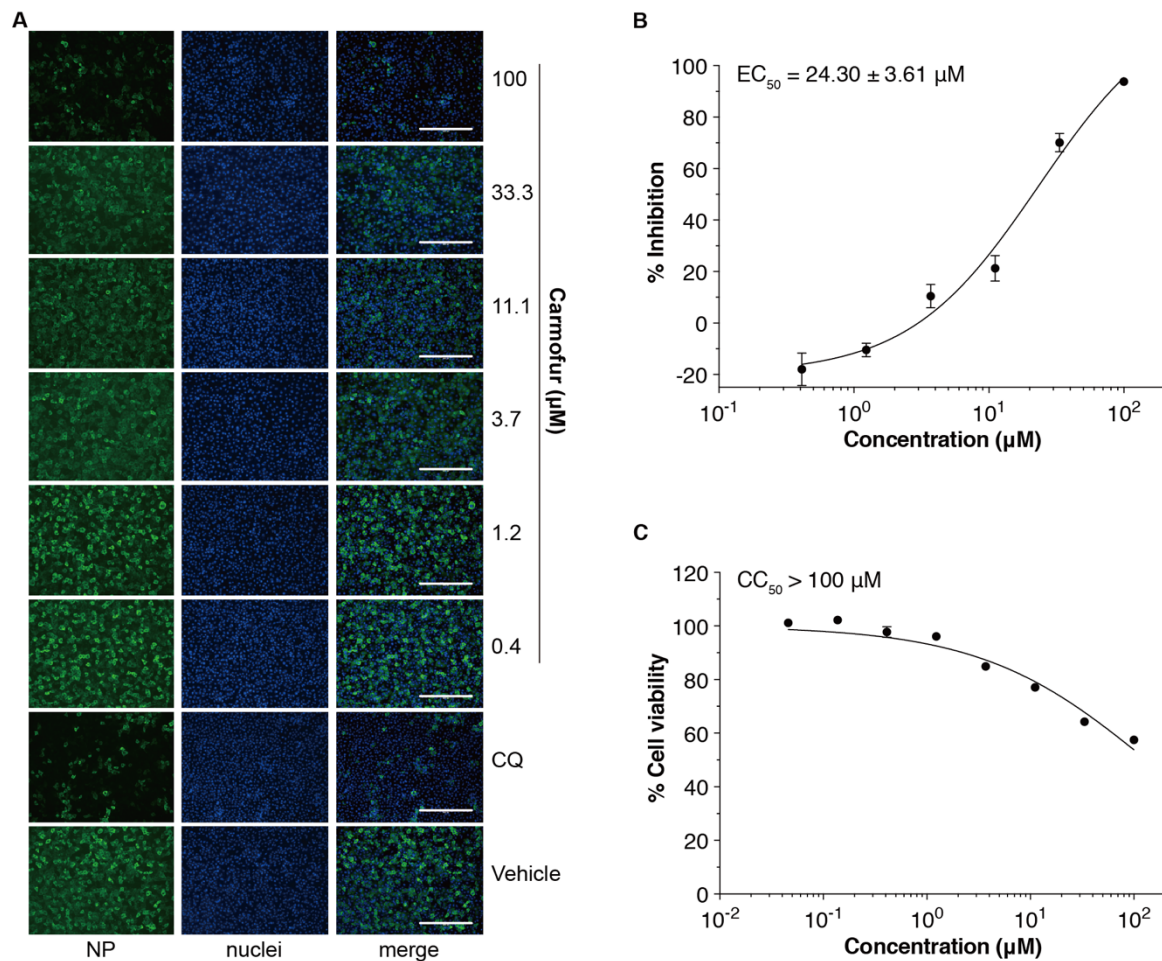

252  
253

254

### Figure 3. Inhibition of SARS-CoV-2 by carmofur in Vero E6 cells

255 Vero E6 cells infected with SARS-CoV-2 at a MOI of 0.05 were treated with carmofur  
256 at a range of different concentrations.

257 A. At 24 hours p.i., cells were fixed, and intracellular NP levels were monitored by  
258 immunofluorescence. Chloroquine (CQ, 10 μM) was used as a positive control.  
259 Bars: 400 μm

260 B. Cell viability was measured using a CCK8 assay. The Y-axis represents mean % of  
261 cell viability. The experiments were performed in triplicate, and data shown are for  
262 the mean values ± SE.

263 C. Supernatant was collected and viral copy number in the supernatant was measured  
264 with quantitative RT-PCR. The Y-axis of the graph indicates mean % inhibition of  
265 virus, the experiments were performed in triplicate, and data shown are mean values  
266 ± SE.

## 267 **Methods**

### 268 **Cloning, protein expression and purification of COVID-19 virus M<sup>pro</sup>**

269

270 The cell cultures were grown and the protein expressed according to a previous  
271 report<sup>7</sup>. The cell pellets were resuspended in lysis buffer (20mM Tris-HCl pH 8.0, 150  
272 mM NaCl, 5% Glycerol), lysed by high-pressure homogenization, and then centrifuged  
273 at 25,000g for 30 min. The supernatant was loaded onto Ni-NTA affinity column  
274 (Qiagen, Germany), and washed by the lysis buffer containing 20 mM imidazole. The  
275 His tagged M<sup>pro</sup> was eluted by lysis buffer that included 300 mM imidazole. The  
276 imidazole was then removed through desalting. Human rhinovirus 3C protease was  
277 added to remove the C-terminal His tag. COVID-19 virus M<sup>pro</sup> was further purified by  
278 ion exchange chromatography. The purified M<sup>pro</sup> was transferred to 10 mM Tris-HCl  
279 pH 8.0 through desalting and stored at -80 degrees until needed.

### 280 **Crystallization, data collection and structure determination**

281

282 COVID-19 virus M<sup>pro</sup> was concentrated to 5 mg/ml incubated with 0.3 mM  
283 carmofur for 1 hour and the complex was crystallized by hanging drop vapor diffusion  
284 method at 20 °C. The best crystals were grown using a well buffer containing 0.1 M  
285 MES pH 6.0, 5% polyethylene glycol (PEG) 6000, and 3% DMSO. The cryo-protectant  
286 solution was the reservoir but with 20% glycerol added.

287

288 X-ray data were collected on beamline BL17U1 at Shanghai Synchrotron  
289 Radiation Facility (SSRF) at 100 K and at a wavelength of 0.97918 Å using an Eiger X  
290 16M image plate detector. Data integration and scaling were performed using the  
291 program XDS<sup>25</sup>. The structure was determined by molecular replacement (MR) with  
292 the PHASER<sup>26</sup> and Phenix 1.17.1<sup>27</sup> using the COVID-19 virus M<sup>pro</sup> (PDB ID: 6LU7)  
293 as a search template. The model from MR was subsequently subjected to iterative cycles  
294 of manual model adjustment with Coot 0.8<sup>28</sup> and refinement was completed with  
295 Phenix REFINE<sup>29</sup>. The inhibitor, carmofur, was built according to the omit map. The  
296 phasing and refinement statistics are summarized in Extended Data Table 1.  
297 Coordinates and structure factors have been deposited in Protein Data Bank (PDB) with  
298 accession number 7BUY.

### 299 **Antiviral and cytotoxicity assays for carmofur**

300 A clinical isolate COVID-19 virus (nCoV-2019BetaCoV/Wuhan/WIV04/2019)  
301 was propagated in Vero E6 cells, and viral titer was determined as described  
302 previously<sup>23</sup>. For the antiviral assay, pre-seeded Vero E6 cells ( $5 \times 10^4$  cells/well) were  
303 pre-treated with the different concentration of carmofur for 1 h and the virus was  
304 subsequently added (MOI of 0.05) to allow infection for 1 h. Next, the virus-drug  
305 mixture was removed, and cells were further cultured with fresh drug containing  
306 medium. At 24 h p.i. (post infection), the cell supernatant was collected and vRNA in  
307 supernatant was subjected to qRT-PCR analysis, while cells were fixed and subjected  
308 to immunofluorescence to monitor intracellular NP level as described previously<sup>23</sup>. For  
309 cytotoxicity assays, Vero E6 cells were suspended in growth medium in 96-well plates.  
310 The next day, appropriate concentrations of carmofur were added to the medium. After  
311 24 h, the relative numbers of surviving cells were measured by the CCK8 (Beyotime,  
312 China) assay in accordance with the manufacturer's instructions. All experiments were  
313 performed in triplicate, and all the infection experiments were performed at biosafety  
314 level-3 (BSL-3).

### 315 **Acknowledgement**

316 We are grateful to the staff at the BL17U beamline of the Shanghai Synchrotron  
317 Radiation Facility (SSRF), where data were collected. This work was supported by  
318 grants from National Key R&D Program of China (grant No. 2017YFC0840300 to  
319 Z.R.), National Key R&D Program of China (grant No. 2020YFA0707500 to Z.R.),  
320 Project of International Cooperation and Exchanges NSFC (grant No. 81520108019 to  
321 Z.R.), Science and Technology Commission of Shanghai Municipality (grant No.  
322 20431900200), Department of Science and Technology of Guangxi Zhuang  
323 Autonomous Region (grant No. 560 2020AB40007), and the Natural Science  
324 Foundation of China (grant No. 31970165 to Leike Zhang).

325

### 326 **Author contributions**

327 Z.R. and H.Y. conceived the project; Z.J., Y.Z., Z.R., and H.Y. designed the  
328 experiments; Y.Z., Z.J., H.W., Y. Zhu., C.Z., X.D. J.Y. and X.Y. cloned, expressed,  
329 purified and crystallized proteins; Y.Z., B.Z., Z.J. and T.H. collected the diffraction  
330 data; Y.Z, B.Z. and Xiang Liu solved the crystal structure; Y.S., and Y.W. performed  
331 cell-based antiviral assay; Y.D. and L. Z performed qRT-PCR and cytotoxicity assay

332 analysis; Y.Z., J.Z., L.Z., Y.D., X. L., L.G., G.X., Z.R. and H.Y. analyzed and discussed  
333 the data; Y.Z., Z.J., L.Z., L.G. H.Y, and Z.R. wrote the manuscript.

334 **Competing interests**

335 The authors declare no competing interests.

336

337 **Data and materials availability**

338 The PDB accession No. for the coordinates of COVID-19 virus M<sup>pro</sup> in complex with  
339 carmofur is 7BUY.

340

341 **Table S1. Data collection and refinement statistics**  
342

| <b>Data collection</b>                                  |                                     |
|---------------------------------------------------------|-------------------------------------|
| Space group                                             | C2                                  |
| Wavelength (Å)                                          | 0.979                               |
| Cell dimensions                                         |                                     |
| <i>a</i> , <i>b</i> , <i>c</i> (Å)                      | 98.03, 81.65, 51.64                 |
| $\alpha$ , $\beta$ , $\gamma$ (°)                       | 90, 114.879, 90                     |
| Resolution (Å)                                          | 46.85-1.60 (1.64-1.60) <sup>a</sup> |
| Completeness (%)                                        | 99.2 (98.9)                         |
| <i>R</i> <sub>merge</sub> (%)                           | 3.4 (50.9)                          |
| <i>CC</i> <sub>1/2</sub>                                | 99.8 (85.9)                         |
| Redundancy                                              | 3.4 (3.4)                           |
| Mean <i>I</i> / $\sigma$ ( <i>I</i> )                   | 17.25 (2.37)                        |
| <b>Refinement</b>                                       |                                     |
| Resolution (Å)                                          | 25.64-1.6 (1.66-1.60)               |
| No. of reflections                                      | 48563 (4843)                        |
| <i>R</i> <sub>work</sub> / <i>R</i> <sub>free</sub> (%) | 18.59 (27.98)/20.34 (32.43)         |
| No. of non-hydrogen atoms                               | 2601                                |
| Protein                                                 | 2367                                |
| Ligands                                                 | 29                                  |
| Solvent                                                 | 205                                 |
| Average <i>B</i> -factor (Å <sup>2</sup> )              | 38.74                               |
| Protein                                                 | 37.91                               |
| Ligands                                                 | 52.55                               |
| Solvent                                                 | 46.40                               |
| R.m.s deviations                                        |                                     |
| Bond lengths (Å)                                        | 0.016                               |
| Bond angles (°)                                         | 1.370                               |
| Ramachandran plot (%)                                   |                                     |
| Favored                                                 | 97.37                               |
| Allowed                                                 | 2.63                                |
| Outliers                                                | 0.00                                |

343 <sup>a</sup> Values in parentheses are for highest-resolution shell.

344

345

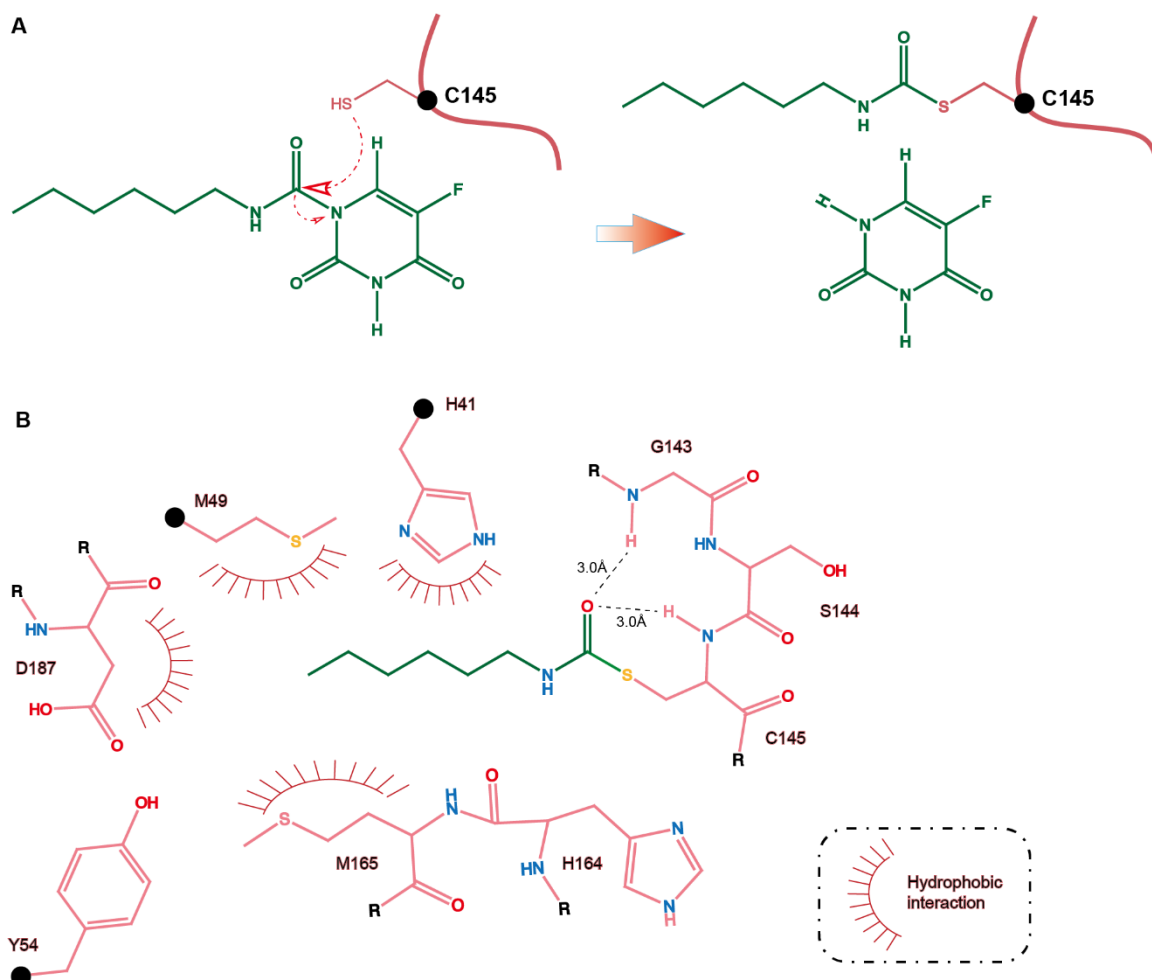

346

347 **Figure S1. Inhibition of M<sup>pro</sup> by carmofur**

348 A. Putative inhibition mechanism. Red curve represents M<sup>pro</sup> polypeptide and the  
349 black sphere represent the C $\alpha$  of C145.

350 B. Schematic diagram of M<sup>pro</sup>-carmofur interactions. Black spheres represent C $\alpha$   
351 atoms.

352

353

354



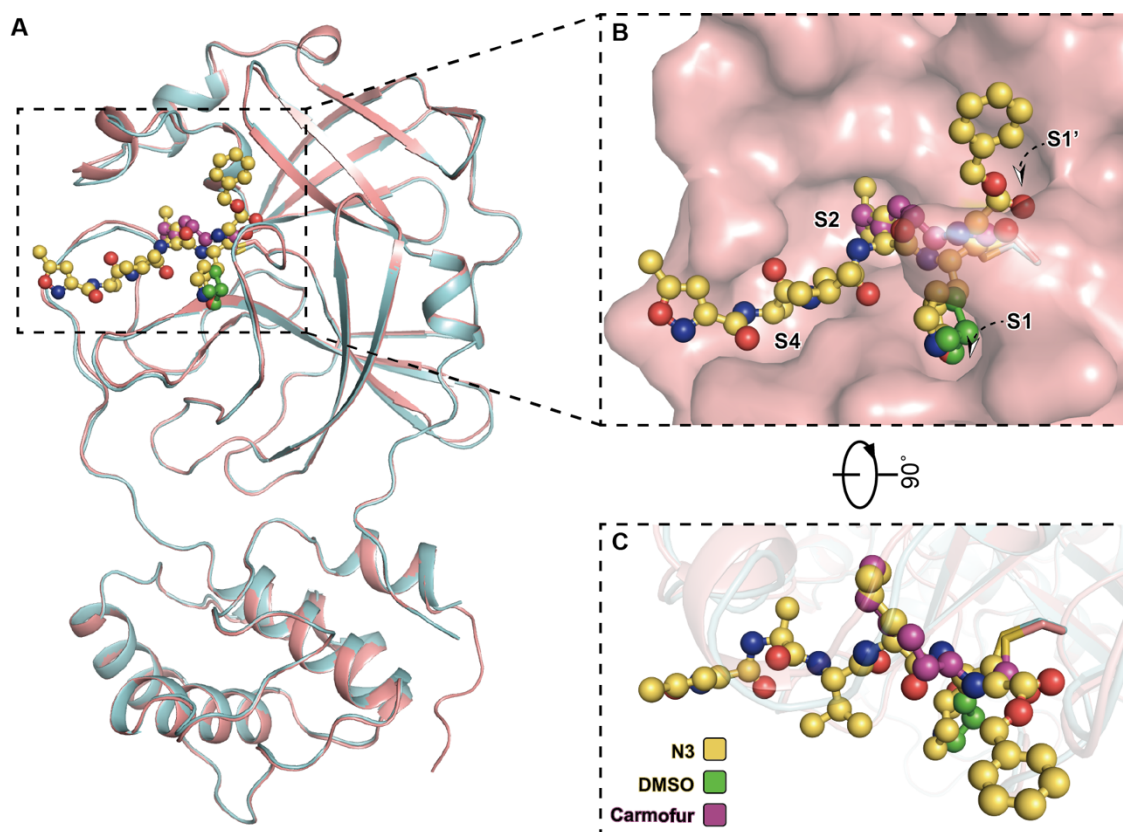

355

356 **Figure S2. Binding mode of carmofur and N3 to M<sup>pro</sup>.**

357 A. Overall structural comparison between the M<sup>pro</sup>-carmofur and M<sup>pro</sup>-N3 complexes.

358 The salmon cartoon represents the carmofur bound structure and the light cyan  
359 represents the N3 bound structure. Carmofur, N3 and DMSO are represented by  
360 the purple, yellow and green balls and sticks, respectively.

361 B. The binding pocket of M<sup>pro</sup>. Carmofur and N3 are represent in the same way as in  
362 Figure S2A.

363 C. Schematic diagram of carmofur and N3.

364

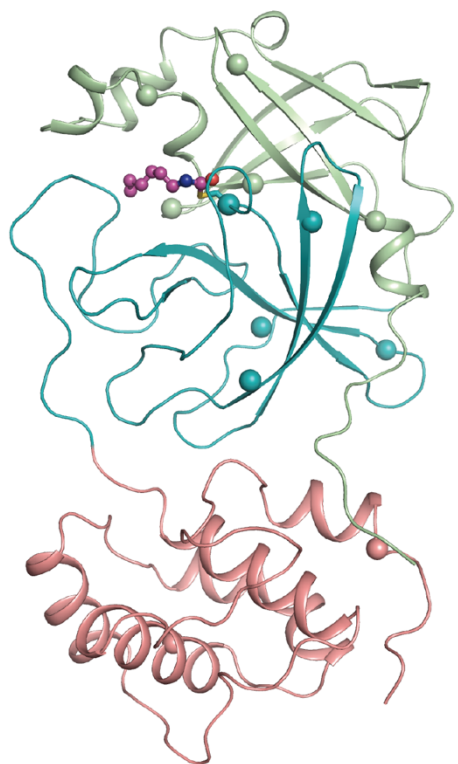

365

366 **Figure S3. Cysteine residues in M<sup>Pro</sup>**

367 Each cysteine side chain is represented by a colored sphere.
